# Supplementary material for: Timing of elective surgery and risk assessment after SARS‐CoV‐2 infection: an update: A multidisciplinary consensus statement on behalf of the Association of Anaesthetists, Centre for Perioperative Care, Federation of Surgical Specialty Associations, Royal College of Anaesthetists, Royal College of Surgeons of England
Source: PubMed Central journal article supplement — Anaesthesia. 2022 Feb 22;77(5):580–7. doi: 10.1111/anae.15699 (PMC9111236; doi:10.1111/anae.15699), 2022-02-22

## Patient information: new statement about timing of elective surgery soon after infection with the virus causing COVID-19

Your operation may be delayed if you test positive for the virus causes COVID-19.  
A new statement analysed evidence and added some advice.

### Why might my operation be delayed?

Studies of people who had COVID-19 just before or after their surgery show that they had more complications and an increased risk of dying. The risks of chest problems, blood clots or death are about 3 or 4 times greater for a full 7 weeks following COVID-19. These risks are increased even if the patient had no symptoms from COVID-19 (i.e. just a positive test).

### What timings are important?

|                                                                |                                                                                                                                                                                                                                                                                                                                                                                                                                                                                                                                                          |
|----------------------------------------------------------------|----------------------------------------------------------------------------------------------------------------------------------------------------------------------------------------------------------------------------------------------------------------------------------------------------------------------------------------------------------------------------------------------------------------------------------------------------------------------------------------------------------------------------------------------------------|
| Within 10 days of your planned surgery date                    | If you have a positive test, or COVID-19 symptoms, elective surgery should not take place because you may be infectious to others (as well as risks to you).                                                                                                                                                                                                                                                                                                                                                                                             |
| Between 10 days and 7 weeks before your planned operation date | Reduce your risks of catching COVID-19. If meeting people, consider social distancing, wearing a facemask, opening windows or meeting outdoors.<br>If you test positive or have COVID-19 symptoms: <ul style="list-style-type: none"> <li>You <b>MUST</b> inform your surgical team.</li> <li>Elective surgery may need to be delayed.</li> <li>Your health professional may undertake a <b>risk assessment</b> with you to decide whether the risks of delaying are worse than the risks of problems with surgery and COVID-19.</li> </ul>              |
| At any time before surgery                                     | Please ensure you stay healthy and prepare for surgery: <ul style="list-style-type: none"> <li>Ensure you have had a full course of vaccinations including a 3<sup>rd</sup> dose/booster. Vaccination reduces the chance of getting COVID-19 and of spreading it as well as reducing the severity of the illness if you get it.</li> <li>Regular exercise, nutrition and stopping smoking reduce complications from surgery by 30–80%. There is more information here: <a href="http://www.cpoc.org.uk/patients">www.cpoc.org.uk/patients</a></li> </ul> |

### How will the peri-operative team decide with me whether to go ahead with surgery?

- There should be a [Shared Decision Making](#) discussion with you. This means a senior clinician being clear about the **B**enefits, **R**isks, **A**lternatives and what happens if you do **N**othing (BRAN).
- The team will do this risk assessment in steps:

**STEP 1** = They will assess your underlying (baseline) risk. Examples include:

| Examples       | High risk                                                                                                                                                                   | Intermediate risk                                                                             | Low risk                                                |
|----------------|-----------------------------------------------------------------------------------------------------------------------------------------------------------------------------|-----------------------------------------------------------------------------------------------|---------------------------------------------------------|
| <b>Surgery</b> | Most inpatient surgery on the bowel, liver, bile duct, head and neck, heart, lungs or major blood vessels. Complex surgery on kidneys, urinary tract, bones or soft tissues | Other types of surgery (such as: breast, uncomplicated bone, soft tissue and plastic surgery) | Most outpatient eye surgery. Minor body surface surgery |
| <b>Patient</b> | Frail, unfit, unwell or with significant underlying health conditions                                                                                                       | Moderately fit and without frailty                                                            | Fit and well                                            |

**STEP 2** = They will add your additional risk of having problems from a recent COVID-19.

Each of these risk factors adds an additional risk:

- Age over 70 years
- The presence of any severe underlying health condition
- Major surgery
- Ongoing COVID-19 symptoms
- COVID-19 illness that required hospitalisation

**STEP 3** = They will consider the risk of delaying surgery. For example, if your condition progresses.

**STEP 4** = Understanding all the risks, the outcome should be agreed:

|                 |                                                                    |                |                  |
|-----------------|--------------------------------------------------------------------|----------------|------------------|
| <b>Outcome:</b> | <i>Delay for at least 7 weeks after infection or positive test</i> | <i>Proceed</i> | <i>Undecided</i> |
|-----------------|--------------------------------------------------------------------|----------------|------------------|

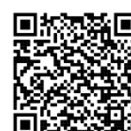

Supplement: ANAE-77-580-s001.pdf [file ANAE-77-580-s001.pdf]
